# Supplementary material for: Acetylation dynamics and stoichiometry in Saccharomyces cerevisiae
Source: PubMed Central journal article supplement (PMC4023402; doi:10.1002/msb.134766), 2014-01-31
Supplement: MSB-10-1-716-s009.pdf [file MSB-10-1-716-s009.pdf]

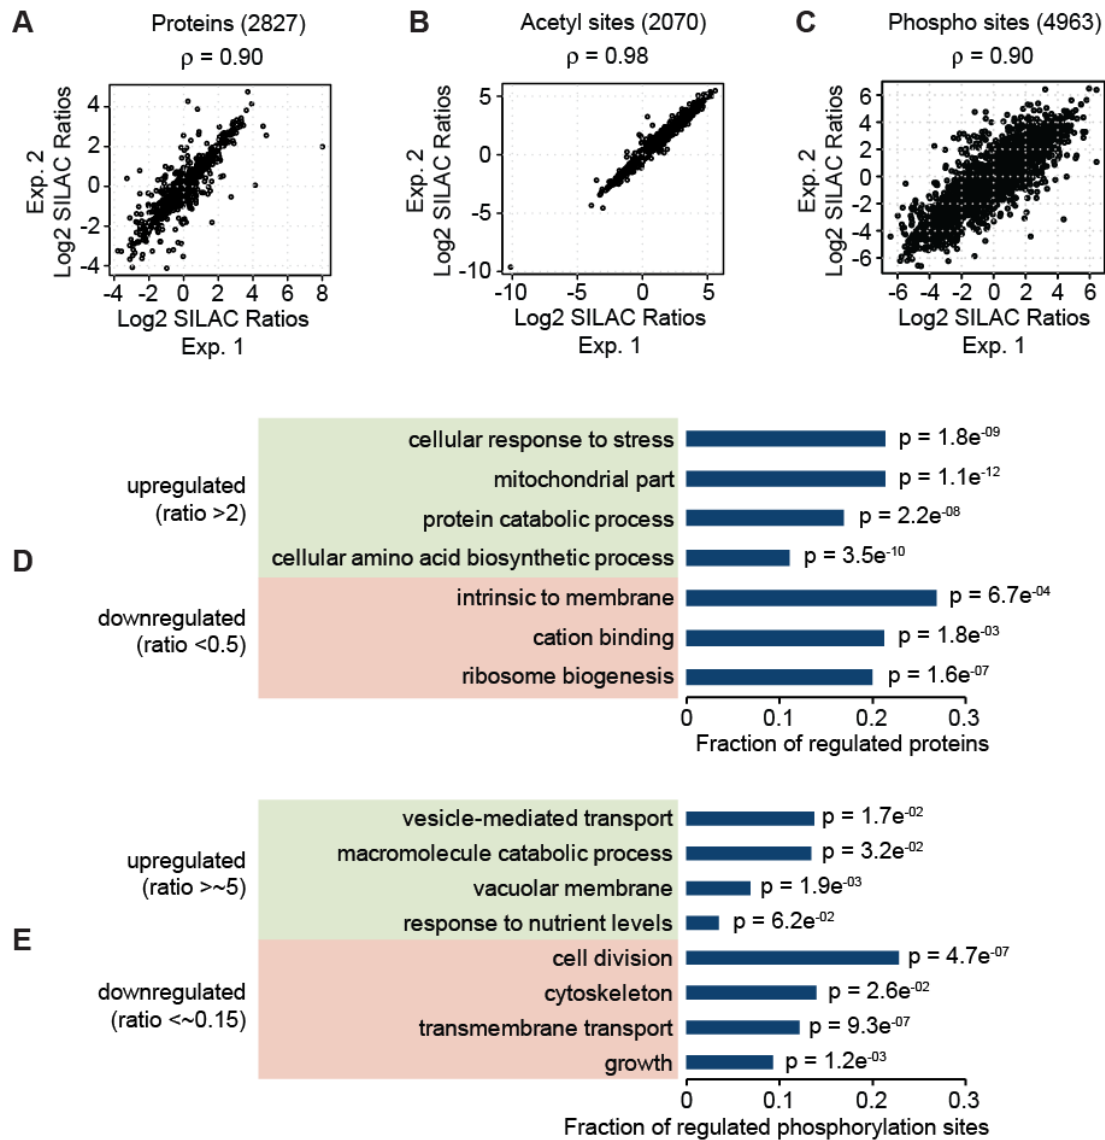

**Figure S1. Proteomic analysis of stationary phase yeast.** (A-C) Scatter plots showing the correlation between biological replicates (experiments 1 and 2, Exp. 1 and Exp. 2) comparing stationary phase to exponential phase yeast. The number of proteins or phosphorylation sites analyzed is indicated in parenthesis and the Spearman's rank correlation coefficient ( $\rho$ ) is shown. (D) Gene ontology terms that are significantly more frequently associated with up- or downregulated proteins are shown. (E) Gene ontology terms that are significantly more frequently associated with up- or downregulated phosphorylation sites are shown. Upregulated sites were determined by taking the sites with the highest ratios corresponding to 10% of the total sites (ratio >~5), downregulated sites were determined by taking sites with the lowest ratios corresponding to 10% of the total sites (ratio

<~0.15). For both C and D gene ontology enrichment and significance was determined using DAVID (Huang da et al, 2009) by comparing regulated proteins to all detected proteins.
