# Supplementary material for: Acetylation dynamics and stoichiometry in Saccharomyces cerevisiae
Source: PubMed Central journal article supplement (PMC4023402; doi:10.1002/msb.134766), 2014-01-31
Supplement: MSB-10-1-716-s013.pdf [file MSB-10-1-716-s013.pdf]

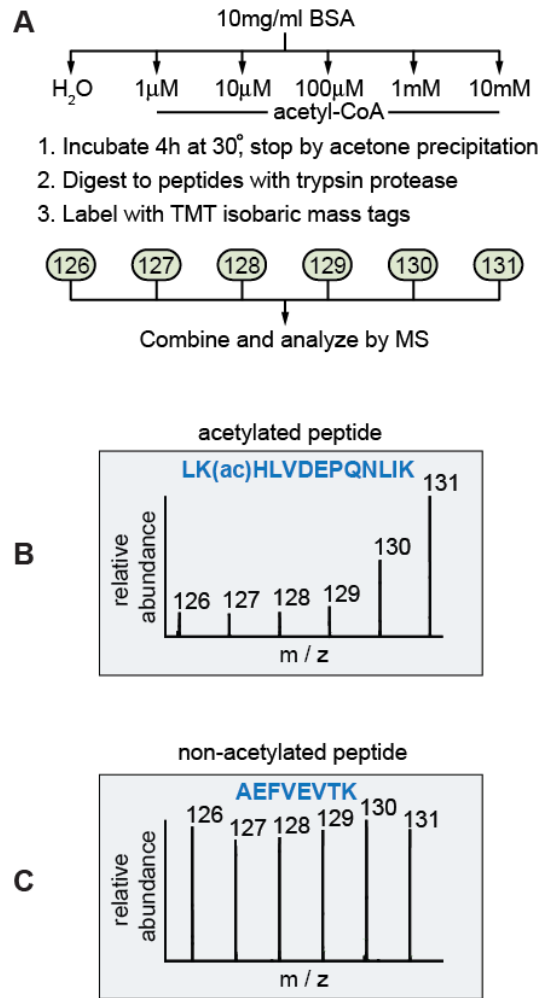

**Figure S3. Nonenzymatic acetylation by acetyl-CoA.** (A) Diagram showing the experimental conditions and quantitative method using TMT isobaric mass tags. (B) Plot showing a representative MS/MS scan of the indicated acetylated peptide. The region containing the TMT reporter ions is shown. (C) Plot showing a representative MS/MS scan and TMT reporter ions for an unmodified peptide as in panel B.
