# Supplementary material for: Acetylation dynamics and stoichiometry in Saccharomyces cerevisiae
Source: PubMed Central journal article supplement (PMC4023402; doi:10.1002/msb.134766), 2014-01-31
Supplement: MSB-10-1-716-s021.pdf [file MSB-10-1-716-s021.pdf]

| Table | SILAC-L                       | SILAC-M                                 | SILAC-H                                               | Total sites       | Decoy sites | FDR   |
|-------|-------------------------------|-----------------------------------------|-------------------------------------------------------|-------------------|-------------|-------|
| S2    | BY4742 Lys <sup>0</sup><br>EP |                                         | BY4742 Lys <sup>8</sup><br>SP                         | 2,784             | 10          | 0.36% |
| S3    | BY4742 Lys <sup>0</sup><br>EP |                                         | BY4742 Lys <sup>8</sup><br>SP                         | 3,327<br>Proteins | 1           | 0.03% |
| S4    | BY4742 Lys <sup>0</sup><br>EP |                                         | BY4742 Lys <sup>8</sup><br>SP                         | 6,260<br>Phospho. | 7           | 0.11% |
| S5    | BY4742 Lys <sup>0</sup><br>EP | BY4742 Lys <sup>4</sup><br>GA + glucose | BY4742 Lys <sup>8</sup><br>GA + 2DG                   | 1,484             | 5           | 0.34% |
| S6    | BY4742 Lys <sup>0</sup><br>EP |                                         | <i>pda1</i> Δ Lys <sup>8</sup><br>EP                  | 1,254             | 3           | 0.24% |
| S6    | BY4742 Lys <sup>0</sup><br>EP |                                         | <i>cit1</i> Δ Lys <sup>8</sup> EP                     | 1,254             | 3           | 0.24% |
| S7    | BY4742 Lys <sup>0</sup><br>EP | BY4742 Lys <sup>4</sup><br>GA           | <i>pda1</i> Δ Lys <sup>8</sup><br>GA                  | 1,988             | 8           | 0.40% |
| S7    | BY4742 Lys <sup>0</sup><br>EP | BY4742 Lys <sup>4</sup><br>GA           | <i>cit1</i> Δ Lys <sup>8</sup><br>GA                  | 1,988             | 8           | 0.40% |
| S8    | BY4742 Lys <sup>0</sup><br>EP |                                         | BY4742 Lys <sup>8</sup><br>GA + 2% Glu.<br>or 2% Ace. | 2,139             | 8           | 0.37% |
| S9    | BY4742 Lys <sup>0</sup><br>EP |                                         | BY4742 Lys <sup>8</sup><br>EP                         | 9,666             | 29          | 0.30% |

**Table S1. Quantitative MS experiments performed in this study.** The yeast strain used and growth phase (exponential phase (EP), stationary phase (SP), or growth-arrested (GA)), SILAC labeling scheme (L=light, M=medium, H=heavy), total sites identified, and the number of sites identified from a reversed sequence, decoy database is shown. The estimated false discovery rate (FDR) is calculated from the frequency of decoy sites identified in the data set (Elias & Gygi, 2007).
