# Supplementary material for: Acetylation dynamics and stoichiometry in Saccharomyces cerevisiae
Source: PubMed Central journal article supplement (PMC4023402; doi:10.1002/msb.134766), 2014-01-31
Supplement: MSB-10-1-716-s032.pdf [file MSB-10-1-716-s032.pdf]

# Supplementary Information

## Acetylation dynamics and stoichiometry in *Saccharomyces cerevisiae*

Brian T. Weinert<sup>1</sup>, Vytautas Iesmantavicius<sup>1</sup>, Tarek Moustafa<sup>2</sup>, Christian Schölz<sup>1</sup>, Sebastian A. Wagner<sup>1</sup>, Christoph Magnes<sup>3</sup>, Rudolf Zechner<sup>2</sup>, and Chunaram Choudhary<sup>1,\*</sup>

<sup>1</sup>The NNF Center for Protein Research, Faculty of Health Sciences, University of Copenhagen, Blegdamsvej 3B, DK-2200 Copenhagen, Denmark

<sup>2</sup>Institute of Molecular Biosciences, University of Graz, Heinrichstrasse 31, A-8010 Graz, Austria

<sup>3</sup>HEALTH – Institute for Biomedicine and Health Sciences, Joanneum Research, Elisabethstrasse 5, A-8010 Graz, Austria

\*Correspondence to: [chuna.choudhary@cpr.ku.dk](mailto:chuna.choudhary@cpr.ku.dk), Phone: +45 35 32 50 20

### Table of contents

**Figure S1.** Proteomic analysis of stationary phase yeast.

**Figure S2.** Quantitative analysis of acetylation dynamics in yeast.

**Figure S3.** Nonenzymatic acetylation by acetyl-CoA.

**Figure S4.** Validating partial chemical acetylation by acetyl-phosphate.

**Supplemental text.** Validating partial chemical acetylation by acetyl-phosphate.

**Supplemental text.** Estimating acetylation stoichiometry based on unmodified corresponding peptides.

**Figure S5.** Yeast acetylation sites are sensitive to treatment with acetyl-phosphate.

**Figure S6.** Unmodified corresponding peptide (CP) abundance is unaffected by treatment with AcP.

**Figure S7.** Determining absolute acetylation stoichiometry using AQUA.

**Figure S8.** Acetylation stoichiometry is proportional to abundance-corrected acetylated peptide intensity.

**Figure S9.** Functional characterization of acetylation stoichiometry.

**Table S1.** Quantitative MS experiments performed in this study.

## Supplemental References

Elias JE, Gygi SP (2007) Target-decoy search strategy for increased confidence in large-scale protein identifications by mass spectrometry. *Nature methods* **4**: 207-214

Ghaemmaghami S, Huh WK, Bower K, Howson RW, Belle A, Dephoure N, O'Shea EK, Weissman JS (2003) Global analysis of protein expression in yeast. *Nature* **425**: 737-741

Huang da W, Sherman BT, Lempicki RA (2009) Systematic and integrative analysis of large gene lists using DAVID bioinformatics resources. *Nat Protoc* **4**: 44-57

Olsen JV, Vermeulen M, Santamaria A, Kumar C, Miller ML, Jensen LJ, Gnad F, Cox J, Jensen TS, Nigg EA, Brunak S, Mann M (2010) Quantitative phosphoproteomics reveals widespread full phosphorylation site occupancy during mitosis. *Science signaling* **3**: ra3
